1 **Microbial dispersal limitation to isolated soil habitats in the McMurdo Dry Valleys**  
2 **of Antarctica**

3

4 Stephen D.J. Archer<sup>1,2</sup>, Kevin C. Lee<sup>2</sup>, Tancredi Caruso<sup>3</sup>, Teruya Maki<sup>4</sup>, Charles K. Lee<sup>5</sup>,  
5 Don A. Cowan<sup>6</sup>, Fernando T. Maestre<sup>7</sup>, Stephen B. Pointing<sup>1,8</sup>

6

7 *<sup>1</sup> Yale-NUS College, National University of Singapore, Singapore 138527*

8 *<sup>2</sup> Institute for Applied Ecology New Zealand, Auckland University of Technology, Auckland*  
9 *1142, New Zealand*

10 *<sup>3</sup> School of Biological Sciences and Global Institute for Food Security, Queen's University*  
11 *Belfast, Belfast BT9 7BL, Northern Ireland, UK*

12 *<sup>4</sup> Department of Chemical Engineering, Kanazawa University, Kanazawa 920-1192, Japan*

13 *<sup>5</sup> International Centre for Terrestrial Antarctic Research, University of Waikato, Hamilton*  
14 *3240, New Zealand*

15 *<sup>6</sup> Centre for Microbial Ecology and Genomics, University of Pretoria, Pretoria 0002, South*  
16 *Africa*

17 *<sup>7</sup> Departamento de Biología y Geología, Física y Química Inorgánica, Escuela Superior de*  
18 *Ciencias Experimentales y Tecnología, Universidad Rey Juan Carlos, C/ Tulipán s/n, 28933*  
19 *Móstoles, Spain*

20 *<sup>8</sup> Department of Biological Sciences, National University of Singapore, Singapore 117558*

21

## 1 **Abstract**

2           Dispersal is a critical yet poorly understood factor underlying macroecological  
3 patterns in microbial communities. Airborne microbial transport is assumed to occupy a  
4 central role in determining dispersal outcomes and extra-range dispersal has important  
5 implications for predicting ecosystem resilience and response to environmental change.  
6 One of the most pertinent biomes in this regard is Antarctica given its geographic  
7 isolation and vulnerability to climate change and human disturbance. Here we report  
8 the first characterisation of microbial diversity in near-ground and high-altitude air  
9 above a typical Antarctic Dry Valley as well as that of underlying soil microbial  
10 communities. We found that persistent airborne inputs were unable to fully explain  
11 local soil community assembly. Comparison with airborne microbial diversity from non-  
12 polar sources suggests that strong selection occurs during atmospheric transport  
13 resulting in regionally isolated airborne inputs and highly specialized soil communities  
14 where fungi displayed greater isolation than bacteria from non-polar sources. Overall  
15 microbial communities from this isolated Antarctic ecosystem displayed limited  
16 connectivity to the global microbial pool. Our findings provide critical insights to  
17 forecast the potential outcomes for microbial communities of climate change-mediated  
18 shifts in air circulation to the Dry Valleys, the largest ice-free region of Antarctica.

19

20

## 1 **Introduction**

2           A key determinant of biogeographic and macroecological patterns in all  
3 microbial communities is dispersal <sup>1</sup>. Microbial uptake to the aerosphere, persistence  
4 during transit and deposition all play a central role in determining dispersal outcomes  
5 <sup>2,3</sup> and extra-range dispersal has important implications for predicting ecosystem  
6 resilience and response to environmental change <sup>4</sup>. Airborne microbial transport on fine  
7 particulate matter has typically been regarded as ubiquitous due to the small size and  
8 survivability of cells <sup>5-7</sup>. Therefore, large scale patterns in microbial diversity are often  
9 viewed as developing largely due to deterministic niche-driven processes <sup>8,9</sup>. Much of  
10 the existing evidence for airborne (also known as aeolian) transport of microorganisms,  
11 typically viewed as a neutral process <sup>10</sup>, is inferred from extant communities at source  
12 and sink locations e.g. <sup>11-13</sup>. Furthermore, direct measurements of airborne microbial  
13 taxa have largely focused on indoor or outdoor built environments e.g. <sup>14-16</sup> rather than  
14 across natural environmental gradients. This limits our understanding of how microbial  
15 transport drives biogeographic patterns. The extent to which the aerosphere is a habitat  
16 as opposed to simply a medium for microbial transport is also unresolved and as a  
17 result the influence of airborne transport on observed patterns in microbial  
18 biogeography has been subject to much speculation supported with little tangible  
19 evidence <sup>17-19</sup>.

20           Antarctica is a focus for microbial ecology research due to its geographic  
21 isolation, lack of trophic complexity and human influence <sup>20</sup> and vulnerability of  
22 endemic biodiversity to climate change <sup>21</sup>. The extent to which airborne immigration  
23 may influence isolated Antarctic terrestrial microbial communities, however, is an  
24 enduring enigma in microbial ecology <sup>22-25</sup>. Highly specialised microbial communities  
25 display strong allopatric signals <sup>26-29</sup>, yet microbial dispersal is conventionally viewed

1 as occurring across inter-continental distances <sup>22,30</sup>. Establishing the extent to which  
2 Antarctic communities are connected to the global system via airborne dispersal also  
3 has key relevance to predicting potential responses of polar ecosystems to  
4 environmental change. Isolated ice-free regions such as the McMurdo Dry Valleys are  
5 devoid of vascular plants and dominated by highly specialised soil microbial  
6 communities <sup>31</sup> that display adaptations to the extreme environmental conditions <sup>32</sup>.  
7 Some taxa, notably cyanobacteria, have been shown to display phylogenetic endemism  
8 in Antarctica at the level of rRNA gene-defined diversity <sup>26-29</sup>. Also, lichenised fungi  
9 displayed patterns in diversity that suggest that they radiated from local refugia rather  
10 than from exogenous sources outside Antarctica <sup>33</sup>. A global theoretical model for  
11 atmospheric aerosols estimated that the rate of airborne microbial exchange to  
12 Antarctica may be extremely low, with 90% of aerosols expected to be of local origin <sup>34</sup>.  
13 In contrast, empirical studies have claimed circum-polar distribution for some  
14 Cyanobacteria, chlorophyte algae, and Fungi <sup>22,30,35</sup>. Antarctica therefore presents a  
15 paradox in microbial biogeography with regard to microbial dispersal.

16 Evidence for airborne microorganisms in Antarctica is scarce: two early studies  
17 on the Antarctic Peninsula (the west continental edge of Antarctica proximal to South  
18 America) identified tentative evidence for airborne bacteria from individual samples  
19 without characterisation beyond a low diversity of common taxa and human- and  
20 penguin- associated bacteria <sup>36,37</sup>. We recently observed that in the relatively isolated  
21 ice-free McMurdo Dry Valleys soil region of East Antarctica airborne bacteria were  
22 recoverable from bulk air and may harbour far greater diversity than previously  
23 envisaged <sup>38</sup>. These studies were generally inconclusive as to the origin and relationship  
24 to local habitats due to methodological constraints (Online Supplementary Material).  
25 Here we use state-of-the art sampling, sequencing and statistical approaches to study

1 the diversity of airborne and soil microbial communities in a typical Antarctic Dry  
2 Valley. We targeted Bacteria and Fungi because these domains are the most abundant  
3 microorganisms in the McMurdo Dry Valleys <sup>31</sup>. We tested the null hypotheses that air  
4 and soil microbial communities are a random sample of the regional and global  
5 microbial pools. For doing so, we acquired massive bulk-air samples and estimated, for  
6 the first time, microbial diversity in near-ground air and underlying soil for low and  
7 high elevation sites, as well as polar air above the boundary layer for surface  
8 interactions and non-polar sources.

9

## 10 **Results and Discussion**

11 The incoming air mass to our study site in the McMurdo Dry Valleys largely  
12 transited above the Antarctic Plateau during the maximum predicted residence time for  
13 bacteria and fungi in air (15 days) <sup>34</sup>, whilst the most distant air mass had a non-polar  
14 origin above the coastal shelf of New Zealand (Fig. 1a). Transport was exclusively from  
15 the Polar Plateau and across the Trans-Antarctic Mountains during the average  
16 residence time for microorganisms in air (Fig. 1a). We thus envisage that severe  
17 selection pressure should occur during airborne transit in an air mass with freezing  
18 temperatures and high UV exposure at mean altitudes of 2769m (3 day transit) and  
19 3034m (15 day transit).

20 In general terms, we found that alpha diversity metrics for air and elevated high-  
21 altitude soils were distinct from those observed in valley soils, with taxa richness being  
22 more variable in valley soils than in air and elevated soils (Fig. 1b,c). These results  
23 highlight the more heterogenous nature of valley soils as a habitat compared with bulk  
24 phase air or elevated altitude soils, where conditions are generally unfavourable to  
25 colonisation. The elevated altitude mineral soil sites may therefore be representative of

1 near-term airborne deposition to this system. Bacterial taxa richness was similar among  
2 all samples although slightly higher in air and elevated soil (Fig. 1b). Conversely, the  
3 richness of fungal taxa was highest in valley soils, and lower in air and elevated soils  
4 (Fig. 1c). Soils also displayed greater evenness and lower richness values than air  
5 samples and this tentatively indicated that airborne fungi are under strong selective  
6 pressure. Ordination analyses of weighted UniFrac distances for bacteria and fungi  
7 supported these trends in alpha diversity (Fig. 1b,c). Valley soil bacterial communities  
8 separated clearly from air and elevated soil communities (Fig. 1b). A similar although  
9 less pronounced pattern was observed for fungi (Fig. 1c).

10 Taxonomic assignment of bacteria and fungi revealed further complexity.  
11 Airborne phylum-level bacterial diversity was dominated by Proteobacteria,  
12 Bacteroidetes and Firmicutes (Fig. 1d, Online Supplementary Information Fig. S2). Phyla  
13 with high relative abundance comprised spore-formers and taxa with known UV and/or  
14 desiccation tolerant traits viewed as advantageous during atmospheric transport <sup>17</sup> and  
15 survival in Antarctic soil <sup>32</sup>. The airborne bacterial samples supported relatively high  
16 levels of taxa associated with marine influence <sup>7</sup> suggesting recruitment during transit  
17 over the Southern Ocean (Online Supplementary Information, Fig. S2). Terrestrial  
18 bacteria were also transported and may have benefited from islands acting as stepping  
19 stones for dispersal <sup>7</sup>. Soil communities supported greater abundance of Actinobacteria  
20 and other taxa typical from arid soils <sup>8</sup>. Near-ground air supported 3-5 fold more  
21 habitat-specific taxa than high-altitude air; samples from the former habitat were most  
22 similar to their underlying soil communities. Valley soils supported 56.4% soil-specific  
23 taxa compared with only 15.8% in elevated high-altitude soils. Valley soils shared very  
24 few taxa with the total air sample pool (4.5%) whilst different air habitats (valley,

1 elevated and high-altitude) shared approximately half the taxa encountered in each  
2 habitat.

3         The most abundant fungal taxa in air were basidiomycetous yeasts (Fig. 1e,  
4 Online Supplementary Information Fig. S2) whereas soils were dominated by  
5 unclassified fungi also including yeasts. The yeasts are thought to be well-adapted to  
6 growth in Antarctic soil habitats<sup>39</sup>. Ascomycetes were also commonly encountered but  
7 Chytrids occurred only in valley soil and air. Valley soils supported 48.3% habitat-  
8 specific taxa while elevated soils and high-altitude air showed the lowest number of  
9 habitat-specific taxa (4.9-8.7%). The different air habitats shared approximately half the  
10 taxa encountered in each habitat. Fungi are well-adapted to conditions anticipated  
11 during atmospheric transport due to the production of resistant spores and UV-  
12 protective compounds<sup>40,41</sup>. Local recruitment may, however, be limited to asexual  
13 states since teleomorph fruiting structures are not known from Antarctic fungi<sup>42</sup>.

14         We achieved near-asymptote in diversity estimation for all samples (Online  
15 Supplementary Information, Supplementary Methods). Thus we further interrogated  
16 the phylogenetic diversity of air and soil by generating distribution heatmaps by habitat  
17 for the 1,000 most abundant taxa. This analysis captured 91% of total bacterial and  
18 96% of total fungal diversity in the libraries (Fig. 2a,b). We also incorporated diversity  
19 data from air originating at the nearest non-polar land mass into this analysis. A striking  
20 pattern emerged where soil bacterial and fungal assemblages in the McMurdo Dry  
21 Valleys were only partially recruited from local air taxa. This pattern cannot be further  
22 explained by airborne recruitment from exogenously sourced aerosols. These findings  
23 support the notion of a system operating in stark contrast with the long-held  
24 assumption that microbial dispersal is ubiquitous and deterministic niche processes are  
25 the primary driver of community assembly in terrestrial surfaces<sup>1,10</sup>. We therefore

1 further interrogated this association using Ecological Network Analysis (Fig. 2c).  
2 Overall non-polar air displayed least connectivity to all other Antarctic habitats as  
3 previously observed by the weak associations and greater Bray-Curtis distances  
4 between them (Fig. 2c). Bacterial communities clustered by habitat type (Fig. 2c). This  
5 pattern is likely to be indicative of selection pressures due to local environmental  
6 filtering, which could combine a mixture of biotic and abiotic factors. Conversely, fungal  
7 communities associated by geographic distance and were thus more likely to be  
8 influenced by dispersal limitation. No significant distance-decay relationships were  
9 observed for airborne or soil communities between valley and elevated sites (air  
10 bacteria  $R^2 = 0.009$ , soil bacteria  $R^2 = 0.006$ , air fungi  $R^2 = 0.016$ , soil fungi  $R^2 = 0.024$ ).  
11 These results indicate that dispersal within the Dry Valleys may be limited and likely  
12 reflects the associated steep environmental gradients present in this region. These  
13 findings provide empirical support to prevailing theoretical models of emission and  
14 transport for biological particles in the atmosphere that predicts relatively low  
15 exchange between Antarctic and non-polar air as well as reduced residence time in air  
16 for fungi compared to bacteria due to allometric considerations <sup>34</sup>.

17 We conducted additional analyses (Nestedness Analysis and Net Relatedness  
18 Index analysis) to reveal the extent to which taxonomic and phylogenetic structuring  
19 reflected the likelihood of exogenous recruitment (Fig. 3). Strong patterns of nestedness  
20 are the classical expectation for a network of highly isolated sites (e.g., distant islands)  
21 where passive sampling from regional pools and ordered sequences of extinctions play  
22 the major roles in structuring local communities <sup>43,44</sup>. Strong or perfect nestedness  
23 indicates that species poor local communities are a proper subset of richer  
24 communities. We used one of the most widely applied metrics of nestedness (NODF <sup>44-</sup>  
25 <sup>46</sup>) and applied it to the occurrence of the 1,000 most abundant bacterial and fungal



1 taxa. The NODF metric, which ranges from 0 (no nestedness) to 100 (perfect  
2 nestedness), can be decomposed into a compositional effect which ranges from 0 (no  
3 nestedness) to 100 (perfect nestedness). This illustrates a compositional effect (i.e.,  
4 species poor communities consist of species that are a subset of richer communities;  
5 NODFc) and an incidence effect (i.e., less frequent species always occur in site with  
6 widespread species; NODFr). Null models applied to these metrics showed that  
7 communities of both Bacteria and Fungi were significantly anti-nested (NODF <30  
8 approx.) (Fig. 3a). This general result implies that passive sampling from the regional  
9 pool alone is not sufficient to explain the structure of local Antarctic communities. Both  
10 Bacteria and Fungi, however, were significantly nested for taxonomic composition  
11 under the hypothesis that nestedness can be maximised by ordering sites from the most  
12 connected, to the least connected, to a global species pool. This suggests that species  
13 poor assemblages of the least connected sites are a proper subset of richer, more  
14 connected sites. Fungi were markedly more nested (NODFc = 62) than Bacteria (NODFc  
15 = 18) (Fig. 3a), suggesting a potential major role of dispersal limitation for this group.

16 The Net Relatedness Index (NRI) added phylogenetic support to the findings of  
17 our Network and Nestedness Analysis. NRI analyses demonstrated that local Antarctic  
18 communities were not a random sample of the species pool. Antarctic samples of  
19 bacteria displayed greater and highly significant phylogenetic clustering than the non-  
20 polar samples, which were almost randomly structured and in some case over-  
21 dispersed (Fig. 3b). Although the pattern itself does not prove any specific process, the  
22 results clearly indicate that Antarctic bacterial communities both in soil and air must  
23 have been selected non-randomly, which is consistent with both the taxonomic and  
24 phylogenetic observations for our air and soil communities. This result is congruent  
25 with observations of biodiversity for other soils in the Dry Valleys region <sup>31,47-49</sup>. The

1 Fungi were always significantly clustered but bacterial communities were always much  
2 more clustered than fungi at any given airborne or soil location. The fungal data should,  
3 however, be interpreted with care given current drawbacks with phylogenetic  
4 reconstruction based on ITS and despite our efforts to correct for them (Online  
5 Supplementary Information: Supplementary Methods). Nonetheless even a cautious  
6 interpretation of the data suggests a limited extent of input from fungal taxa not present  
7 in local reservoirs. This interpretation concurs with our other lines of evidence  
8 presented here and with studies on fungal dispersal from other biomes <sup>50</sup>.

9         Contrary to the view that “everything is everywhere” in terms of airborne  
10 microbial transport, our data indicates that the aerosphere is a strongly selective  
11 habitat that limits dispersal, although the extent may vary between taxonomic groups  
12 and spatial scales. We conclude that inter-continental microbial connectivity to the  
13 McMurdo Dry Valleys of East Antarctica is limited, and this supports the hypothesis that  
14 the Hadley Cell circulation acts as a dispersal barrier to the poles <sup>17</sup> even during the  
15 austral summer when the Polar Vortex is annually at its weakest <sup>51</sup>. The Antarctic  
16 continent supports other smaller ice-free soil regions and whilst we are unable to  
17 directly extrapolate our data to these, it is reasonable to expect similar patterns given  
18 what is known of air circulation to the continent; that is, that other Antarctic ice-free  
19 areas may also be somewhat decoupled from global microbial reservoirs. An exception  
20 may be the peninsula in West Antarctica due to its proximity to the South American  
21 continent. Comparison of our soil biodiversity estimates with those for other Dry  
22 Valleys locations suggest there is a common core diversity throughout the Antarctic Dry  
23 Valleys <sup>39,47–49,52</sup>. Hence, we expect our data to be broadly applicable to this region. The  
24 low level of airborne immigration from exogenous sources may represent an inherently  
25 low flux for Antarctica despite supplementation from pulsed inputs of diversity from

1 stochastic events. This may help to explain the unique microbial composition of  
2 Antarctic soils compared to others globally <sup>53</sup>.

3         We have presented multiple lines of evidence to refute the null hypothesis that  
4 local air and soil microorganisms are a random sample of phylogenetic diversity in the  
5 regional/global pools. Sources of recruitment other than persistent airborne transport  
6 are therefore necessary to fully explain the extant Antarctic soil microbial diversity  
7 patterns observed. One potential explanation is stochastic storm events where  
8 particulate matter supporting biological propagules is thought to be transported on  
9 local scales within the Dry Valleys <sup>54</sup>, although we did not encounter any such events  
10 during our sampling expedition. A further source may be local dispersal from  
11 geothermal refugia as they are important reservoirs for radiative dispersal of animal,  
12 plant and lichen taxa <sup>21</sup>. The periodicity from which dispersal from such reservoirs  
13 occurs is, however, unknown. An additional reservoir may be the moisture-sufficient  
14 soil around lakes where microbial mats are known to persist over inter-annual periods  
15 <sup>55</sup>. Local refugia may be important in facilitating resilience at the landscape scale where  
16 severe local extinction pressure occurs due to stochasticity and steep environmental  
17 gradients for abiotic variables <sup>56</sup>. Challenges remain in deciphering the relationship of  
18 diversity patterns to biomass and ecosystem function <sup>32,57</sup>, but the revelation that  
19 airborne connectivity is largely localised rather than being an inter-continental scale  
20 process emphasises the conservation value of the McMurdo Dry Valleys as a unique  
21 ecosystem. This is particularly pertinent in light of a predicted increase in stochasticity  
22 for atmospheric air circulation as a result of climate change <sup>58</sup>, which may led to an  
23 increased flux of foreign and invasive taxa into Antarctic ecosystems. Such an increased  
24 flux acting in concert with warmer temperatures could profoundly alter the unique

1 biota inhabiting the Antarctic Dry Valleys, one of the of the last pristine ecosystems on  
2 Earth.

3

#### 4 **Methods**

5 Air mass at near-surface (1.5m above ground) and underlying ultra-oligotrophic  
6 soil was sampled from 11 to 23 January 2017 at eight representative valley and  
7 elevated locations throughout the Wright Valley, McMurdo Dry Valleys, Antarctica  
8 (77.518633 S, 161.768783 E, Supplementary Information Fig. S1). Air mass above the  
9 boundary layer for surface influence was achieved by mounting the apparatus in a  
10 helicopter with an external sampling port (flightpath: 2,000m AMSL, 77.440836 S,  
11 162.657553 E to 77.524583 S, 161.690917 E). Air sampling was also conducted at the  
12 only significant non-polar terrestrial landmass (New Zealand) on the projected back  
13 trajectory for incoming air mass. High volume liquid impinger pumps were used to  
14 collect airborne microorganisms directly into RNA*later* nucleic acid preservation  
15 solution. Extensive use of controls and apparatus sterilisation ensured high fidelity of  
16 the sampling for the ultra-low biomass habitats. Overall, biotic data was retrieved for 30  
17 massive bulk-phase air samples with a total sampled volume of 2,160,000 L and  
18 massive air volumes were collected for each discreet air sample (72,000 L). A detailed  
19 sampling rationale and methodology is described in the Supplementary Methods  
20 (Online Supplementary Information).

21 Diversity assessments for bacteria and fungi, the two most abundant microbial  
22 groups in the Dry Valleys, were made using Illumina MiSeq sequencing of rRNA loci. A  
23 total of 3636 bacterial amplicon sequence variants (ASVs) and 5525 fungal operational  
24 taxonomic units (OTUs) were identified (Online Supplementary Information:  
25 Supplementary Methods). Bacterial 16S rRNA-defined ASVs were delineated using the

1 DADA2 method for exact sample sequence inference <sup>59</sup> and fungal ITS-defined OTUs  
2 using 97% sequence similarity clustering approach <sup>60</sup> (Online Supplementary  
3 Information: Supplementary Methods). We achieved near-asymptote in diversity  
4 estimation for all samples (Online Supplementary Information: Supplementary  
5 Methods). All sequence data generated by this study has been submitted to the EMBL  
6 European Nucleotide Archive (ENL) under BioProject PRJEB27416 with accession  
7 numbers ERS3573837 to ERS3573946. All diversity metrics and alpha/beta diversity  
8 estimates were made using R <sup>61</sup> (all packages employed listed in Online Supplementary  
9 Information, Supplementary Methods). We employed Network Analysis, Nestedness  
10 Analysis and Net Relatedness Index to test the null hypothesis that local air and soil  
11 microorganisms are a random sample of phylogenetic diversity in the regional/global  
12 pools (Online Supplementary Information: Supplementary Methods).

13

## 14 **Acknowledgements**

15 Field and logistical support was provided by Antarctica New Zealand and the United  
16 States Antarctic Program. The authors thank Craig Cary (University of Waikato) for  
17 facilitating access to the McMurdo Dry Valleys. The research was funded by a grant from  
18 the New Zealand Ministry of Business, Innovation & Employment (UOWX1401) and the  
19 Yale-NUS College Start-Up Fund. F.T.M. is supported by the European Research Council  
20 (BIODESERT project, ERC Grant agreement n° 647038).

21

## 22 **Author contributions**

23 S.D.J.A. and S.B.P. conceived the study; S.D.J.A and C.K.L. conducted fieldwork; T.M.

1 developed and validated the helicopter sampling method; S.D.J.A. performed laboratory  
2 experiments; S.D.J.A., K.C.L., T.C., and S.B.P. performed data analysis and interpretation;  
3 D.A.C., F.T.M. and S.B.P. critically assessed and interpreted the findings; S.B.P. wrote the  
4 manuscript with input from all authors.

## 6 **Materials & Correspondence**

7 Correspondence and requests for materials should be addressed to S.B.P. Email:  
8 [stephen.pointing@yale-nus.edu.sg](mailto:stephen.pointing@yale-nus.edu.sg).

## 10 **References**

- 11 1. Hanson, C. A., Fuhrman, J. A., Horner-Devine, M. C. & Martiny, J. B. H. Beyond  
12 biogeographic patterns: processes shaping the microbial landscape. *Nat. Rev.*  
13 *Microbiol.* **10**, 497–506 (2012).
- 14 2. Burrows, S. M., Elbert, W., Lawrence, M. G. & Pöschl, U. Bacteria in the global  
15 atmosphere – Part 1: Review and synthesis of literature data for different  
16 ecosystems. *Atmos. Chem. Phys.* **9**, 9263–9280 (2009).
- 17 3. Kellogg, C. A. & Griffin, D. W. Aerobiology and the global transport of desert dust.  
18 *Trends Ecol. Evol.* **21**, 638–644 (2006).
- 19 4. Wilson, J. R. U., Dormontt, E. E., Prentis, P. J., Lowe, A. J. & Richardson, D. M.  
20 Something in the way you move: dispersal pathways affect invasion success.  
21 *Trends Ecol. Evol.* **24**, 136–44 (2009).
- 22 5. de Wit, R. & Bouvier, T. ‘Everything is everywhere, but, the environment selects’;  
23 what did Baas Becking and Beijerinck really say? *Environ. Microbiol.* **8**, 755–758  
24 (2006).

- 1 6. Finlay, B. J. & Clarke, K. J. Ubiquitous dispersal of microbial species. *Nature* **400**,
- 2 828–828 (1999).
- 3 7. Mayol, E. *et al.* Long-range transport of airborne microbes over the global tropical
- 4 and subtropical ocean. *Nat. Commun.* **8**, 201 (2017).
- 5 8. Delgado-Baquerizo, M. *et al.* A global atlas of the dominant bacteria found in soil.
- 6 *Science (80-. ).* **359**, 320–325 (2018).
- 7 9. Wang, J. *et al.* Phylogenetic beta diversity in bacterial assemblages across
- 8 ecosystems: deterministic versus stochastic processes. *ISME J.* **7**, 1310–1321
- 9 (2013).
- 10 10. Lowe, W. H. & McPeck, M. A. Is dispersal neutral? *Trends Ecol. Evol.* **29**, 444–50
- 11 (2014).
- 12 11. Barberán, A., Henley, J., Fierer, N. & Casamayor, E. O. Structure, inter-annual
- 13 recurrence, and global-scale connectivity of airborne microbial communities. *Sci.*
- 14 *Total Environ.* **487**, 187–195 (2014).
- 15 12. Favet, J. *et al.* Microbial hitchhikers on intercontinental dust: catching a lift in
- 16 Chad. *ISME J.* **7**, 850–67 (2013).
- 17 13. Barberán, A. *et al.* Continental-scale distributions of dust-associated bacteria and
- 18 fungi. *Proc. Natl. Acad. Sci. U.S.A.* **112**, (2015).
- 19 14. Woo, A. C. *et al.* Temporal variation in airborne microbial populations and
- 20 microbially-derived allergens in a tropical urban landscape. *Atmos. Environ.* **74**,
- 21 291–300 (2013).
- 22 15. Bowers, R., McLetchie, S., Knight, R. & Fierer, N. Spatial variability in airborne
- 23 bacterial communities across land-use types and their relationship to the
- 24 bacterial communities of potential source environments. *ISME J.* **5**, 601–612
- 25 (2011).

- 1 16. Gilbert, J. A. & Stephens, B. Microbiology of the built environment. *Nat. Rev.*  
2 *Microbiol.* **16**, 661–670 (2018).
- 3 17. Womack, A. M., Bohannon, B. J. M. & Green, J. L. Biodiversity and biogeography of  
4 the atmosphere. *Philos. Trans. R. Soc. Lond. B. Biol. Sci.* **365**, 3645–53 (2010).
- 5 18. Fröhlich-Nowoisky, J. *et al.* Bioaerosols in the Earth system: Climate, health, and  
6 ecosystem interactions. *Atmos. Res.* **182**, 346–376 (2016).
- 7 19. Despre, V. R. *et al.* Primary biological aerosol particles in the atmosphere: a  
8 review. *Tellus B* **64**, doi: 10.3402/tellusb.v64i0.15598 (2012).
- 9 20. Cowan, D. A. D. A. *et al.* Non-indigenous microorganisms in the Antarctic:  
10 assessing the risks. *Trends Microbiol* **19**, 540–548 (2011).
- 11 21. Chown, S. L. *et al.* The changing form of Antarctic biodiversity. *Nature* **522**, 431  
12 (2015).
- 13 22. Kleinteich, J. *et al.* Pole-to-Pole Connections: Similarities between Arctic and  
14 Antarctic Microbiomes and Their Vulnerability to Environmental Change. *Front.*  
15 *Ecol. Evol.* **5**, 137 (2017).
- 16 23. Pointing, S. B. *et al.* Biogeography of photoautotrophs in the high polar biome.  
17 *Front. Plant Sci. Funct. Plant Ecol.* **6**, 692 (2015).
- 18 24. Vincent, W. F. Evolutionary origins of Antarctic microbiota: invasion, selection  
19 and endemism. *Antarct. Sci.* **12**, 374–385 (2000).
- 20 25. Pearce, D. A. *et al.* Microorganisms in the atmosphere over Antarctica. *FEMS*  
21 *Microbiol. Ecol.* **69**, 143–157 (2009).
- 22 26. Bahl, J. *et al.* Ancient origins determine global biogeography of hot and cold desert  
23 cyanobacteria. *Nat. Commun.* **2**, 163 (2011).
- 24 27. Jungblut, A., Lovejoy, C. & Vincent, W. Global distribution of cyanobacterial  
25 ecotypes in the cold biosphere. *ISME J.* **4**, 191–202 (2010).



- 1 28. Vyverman, W. *et al.* Evidence for widespread endemism among Antarctic micro-  
2 organisms. *Polar Sci.* **4**, 103–113 (2010).
- 3 29. Taton, A. *et al.* Polyphasic study of Antarctic cyanobacterial strains. *J. Phycol.* **42**,  
4 1257–1270 (2006).
- 5 30. Cox, F., Newsham, K. K., Bol, R., Dungait, J. A. J. & Robinson, C. H. Not poles apart:  
6 Antarctic soil fungal communities show similarities to those of the distant Arctic.  
7 *Ecol. Lett.* **19**, 528–536 (2016).
- 8 31. Pointing, S. B. *et al.* Highly specialized microbial diversity in hyper-arid polar  
9 desert. *Proc. Natl. Acad. Sci. U. S. A.* **106**, 19964–19969 (2009).
- 10 32. Chan, Y., Van Nostrand, J. D., Zhou, J., Pointing, S. B. & Farrell, R. L. Functional  
11 ecology of an Antarctic Dry Valley. *Proc. Natl. Acad. Sci. U. S. A.* **110**, 8990–5  
12 (2013).
- 13 33. Fraser, C. I., Terauds, A., Smellie, J., Convey, P. & Chown, S. L. Geothermal activity  
14 helps life survive glacial cycles. *Proc. Natl. Acad. Sci. U. S. A.* **111**, 5634–9 (2014).
- 15 34. Burrows, S. M. *et al.* Bacteria in the global atmosphere – Part 2: Modeling of  
16 emissions and transport between different ecosystems. *Atmos. Chem. Phys.* **9**,  
17 9281–9297 (2009).
- 18 35. Biondi, N. *et al.* Cyanobacteria from benthic mats of Antarctic lakes as a source of  
19 new bioactivities. *J. Appl. Microbiol.* **105**, 105–115 (2008).
- 20 36. Kobayashi, F. *et al.* Atmospheric bioaerosols originating from Adélie penguins  
21 (*Pygoscelis adeliae*): Ecological observations of airborne bacteria at Hukuro Cove,  
22 Langhovde, Antarctica. *Polar Sci.* **10**, 71–78 (2016).
- 23 37. Pearce, D. A., Hughes, K. A., Lachlan-Cope, T., Harangozo, S. A. & Jones, A. E.  
24 Biodiversity of air-borne microorganisms at Halley station, Antarctica.  
25 *Extremophiles* **14**, 145–159 (2010).

- 1 38. Bottos, E. M. E. M., Woo, A. C. A. C., Zawar-Reza, P., Pointing, S. B. S. B. & Cary, S. C.  
2 S. C. Airborne Bacterial Populations Above Desert Soils of the McMurdo Dry  
3 Valleys, Antarctica. *Microb. Ecol.* **67**, 120–128 (2013).
- 4 39. Rao, S. *et al.* Low-diversity fungal assemblage in an Antarctic Dry Valleys soil.  
5 *Polar Biol.* **35**, 567–574 (2011).
- 6 40. Braga, G. U. L., Rangel, D. E. N., Fernandes, É. K. K., Flint, S. D. & Roberts, D. W.  
7 Molecular and physiological effects of environmental UV radiation on fungal  
8 conidia. *Curr. Genet.* **61**, 405–425 (2015).
- 9 41. Robinson, C. H. Cold adaptation in Arctic and Antarctic fungi. *New Phytol.* **151**,  
10 341–353 (2001).
- 11 42. De Los Ríos, A., Wierzchos, J. & Ascaso, C. The lithic microbial ecosystems of  
12 Antarctica's McMurdo Dry Valleys. *Antarct. Sci.* **26**, 459–477 (2014).
- 13 43. Patterson, B. D. & Atmar, W. Nested subsets and the structure of insular  
14 mammalian faunas and archipelagos. *Biol. J. Linn. Soc.* **28**, 65–82 (1986).
- 15 44. Ulrich, W., Almeida-Neto, M. & Gotelli, N. J. A consumer's guide to nestedness  
16 analysis. *Oikos* **118**, 3–17 (2009).
- 17 45. Almeida-Neto, M., Guimarães, P., Guimarães, P. R., Loyola, R. D. & Ulrich, W. A  
18 consistent metric for nestedness analysis in ecological systems: reconciling  
19 concept and measurement. *Oikos* **117**, 1227–1239 (2008).
- 20 46. Ulrich, W. *et al.* A comprehensive framework for the study of species co-  
21 occurrences, nestedness and turnover. *Oikos* **126**, 1607–1616 (2017).
- 22 47. Lee, C. K. *et al.* The Inter-Valley Soil Comparative Survey: the ecology of Dry Valley  
23 edaphic microbial communities. *ISME J* **6**, 1046–1057 (2012).
- 24 48. Wei, S. T. S. *et al.* Taxonomic and Functional Diversity of Soil and Hypolithic  
25 Microbial Communities in Miers Valley, McMurdo Dry Valleys, Antarctica.

- 1 *Frontiers in Microbiology* **7**, 1642 (2016).
- 2 49. Niederberger, T. D. *et al.* Microbial community composition in soils of Northern  
3 Victoria Land, Antarctica. *Env. Microbiol* **10**, 1713–1724 (2008).
- 4 50. Brown, S. P. & Jumpponen, A. Phylogenetic diversity analyses reveal disparity  
5 between fungal and bacterial communities during microbial primary succession.  
6 *Soil Biol. Biochem.* **89**, 52–60 (2015).
- 7 51. Thompson, D. W. J. & Solomon, S. Interpretation of Recent Southern Hemisphere  
8 Climate Change. *Science (80-. )*. **296**, 895–899 (2002).
- 9 52. Stomeo, F. *et al.* Abiotic factors influence microbial diversity in permanently cold  
10 soil horizons of a maritime-associated Antarctic Dry Valley. *FEMS Microbiol Ecol*  
11 **82**, 326–340 (2012).
- 12 53. Fierer, N. *et al.* Cross-biome metagenomic analyses of soil microbial communities  
13 and their functional attributes. *Proc. Natl. Acad. Sci. USA* **109**, 21390–21395  
14 (2012).
- 15 54. Atkins, C. B. & Dunbar, G. B. Aeolian sediment flux from sea ice into Southern  
16 McMurdo Sound, Antarctica. *Glob. Planet. Change* **69**, 133–141 (2009).
- 17 55. Wood, S. A., Rueckert, A., Cowan, D. A. & Cary, S. C. Sources of edaphic  
18 cyanobacterial diversity in the Dry Valleys of Eastern Antarctica. *ISME J* **2**, 308–  
19 320 (2008).
- 20 56. Pointing, S. B. S. B., Bollard-Breen, B. & Gillman, L. N. Diverse cryptic refuges for  
21 life during glaciation. *Proc. Natl. Acad. Sci. U. S. A.* **111**, 5452–5453 (2014).
- 22 57. Pointing, S. B., Fierer, N., Smith, G. J. D., Steinberg, P. D. & Wiedmann, M.  
23 Quantifying human impact on Earth’s microbiome. *Nat. Microbiol.* **1**, 16145  
24 (2016).
- 25 58. Turner, J. Antarctic Climate. in *Encyclopedia of Atmospheric Sciences* 98–106

- 1 (Academic Press, 2015). doi:10.1016/B978-0-12-382225-3.00044-X
- 2 59. Callahan, B. J., McMurdie, P. J. & Holmes, S. P. Exact sequence variants should  
3 replace operational taxonomic units in marker-gene data analysis. *ISME J.* **11**,  
4 2639–2643 (2017).
- 5 60. Schoch, C. L. *et al.* Nuclear ribosomal internal transcribed spacer (ITS) region as a  
6 universal DNA barcode marker for Fungi. *Proc. Natl. Acad. Sci. U. S. A.* **109**, 6241–6  
7 (2012).
- 8 61. Team, R. C. R: A language and environment for statistical computing. *R Foundation*  
9 *for Statistical Computing* (2014).
- 10 62. Horner-Devine, M. C. & Bohannan, B. J. M. Phlogenetic lustering and  
11 overdispersion in bacterial communities. *Ecology* **87**, S100–S108  
12  
13

1 **Display Items (3 Figures)**

2

3 **Fig. 1. Antarctic air and soil habitats support distinct bacterial and fungal**  
4 **communities. a)** Route predictions for average minimum and maximum modelled  
5 residence time for microorganisms in air based on HYSPLIT back trajectory analyses.  
6 Back trajectories indicate distance travelled for sampled air mass at 3 d (598 - 2581 km  
7 distance, average altitude of 2769 m, maximum altitude of 5174 m A.M.S.L.) and 15 d  
8 (4673 - 11216 km distance average altitude 3034m, maximum altitude 6886 km). **b)**  
9 **and c)** Alpha diversity estimates (Chao1 richness and Pielou's relative evenness) and  
10 visualisation of community dissimilarity using Principal Co-ordinate Analysis of  
11 weighted UniFrac distance by habitat for **b)** Bacteria and **c)** Fungi. Boxplot whiskers  
12 represent 1.5 times the interquartile range from the first to the third quartiles or the  
13 maximum/minimum data point within the range. **d) and e)** Distribution and relative  
14 abundance of **d)** Bacteria and **e)** Fungi in Antarctic air and soil. Each stack bar  
15 represents data from three pooled replicates for each substrate location. Diversity is  
16 shown at phylum level as this is the highest taxonomic rank at which between-substrate  
17 differences are noticeable. Venn diagrams show amplicon sequence variants (ASVs) and  
18 operational taxonomic units (OTUs) count and percentage occurrence within and  
19 between each habitat. The high altitude samples, i.e., those without underlying soil, do  
20 not have corresponding soil samples. Sampling locations: valley (soil and 1.5m above  
21 ground), elevated (soil and 1.5m above ground at higher altitude locations at Bull Pass  
22 and valley ridges), 2000m (helicopter samples). Interactive graphics identifying  
23 taxonomic composition to lower taxonomic ranks within each sample are presented in  
24 the Online Supplementary Information (Fig. S2). Comparison with non-polar samples is  
25 given in the Online Supplementary Information Fig. S2.

26

1

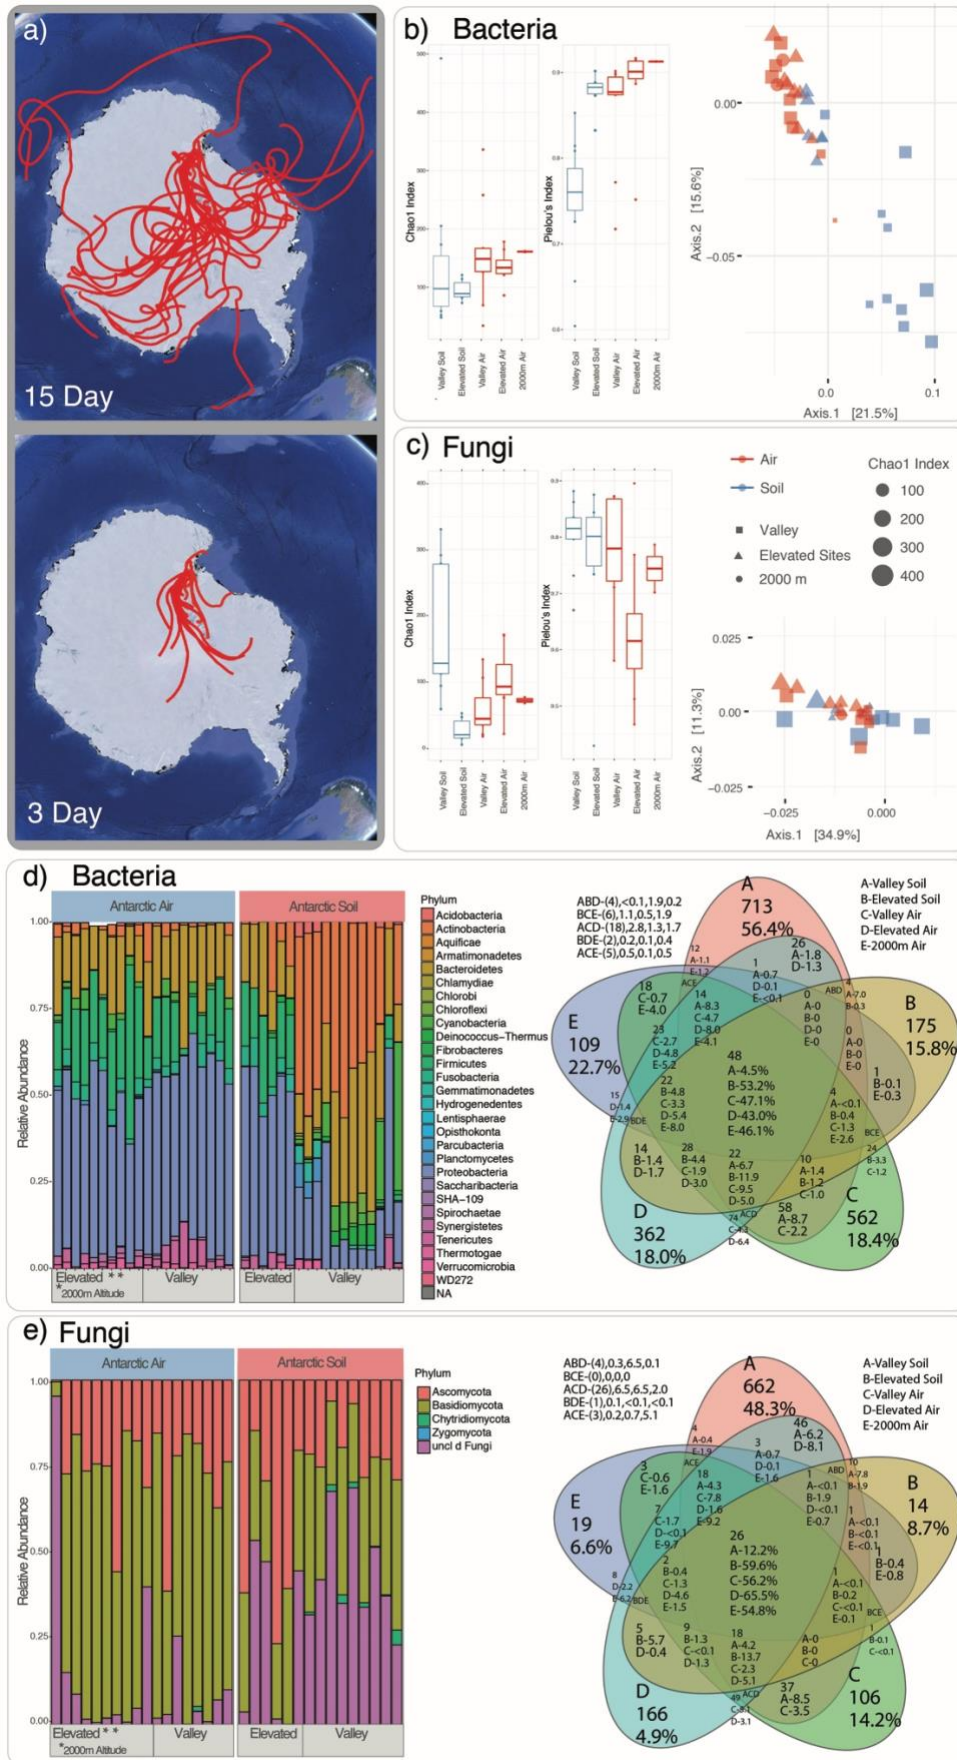

2  
3

1 **Fig. 2. Comparison of bacterial and fungal diversity from Antarctic and non-polar**  
2 **sources. a)** Distribution and relative abundance for the 1,000 most abundant bacterial  
3 amplicon sequence variants (ASVs) and fungal operational taxonomic units (OTUs). **b)**  
4 Rarefaction curves are shown for Bacteria and Fungi for each Antarctic habitat to  
5 illustrate sampling depth to near-asymptote. **c)** Co-occurrence associations derived  
6 from Ecological Network Analysis. We enforced maximum Bray-Curtis distance  
7 of 0.2 for Bacteria and 0.4 for Fungi to establish connection between nodes  
8 (representing communities). The nodes were positioned using the Fruchterman-  
9 Reingold method. Sampling locations: valley (soil and 1.5m above ground), elevated  
10 (soil and 1.5m above ground at higher altitude locations at Bull Pass and valley ridges),  
11 2000m (helicopter samples) and New Zealand (non-polar). Full taxonomic comparison  
12 for all polar and non-polar samples is given in the Online Supplementary Information  
13 Fig. S2.  
14  
15

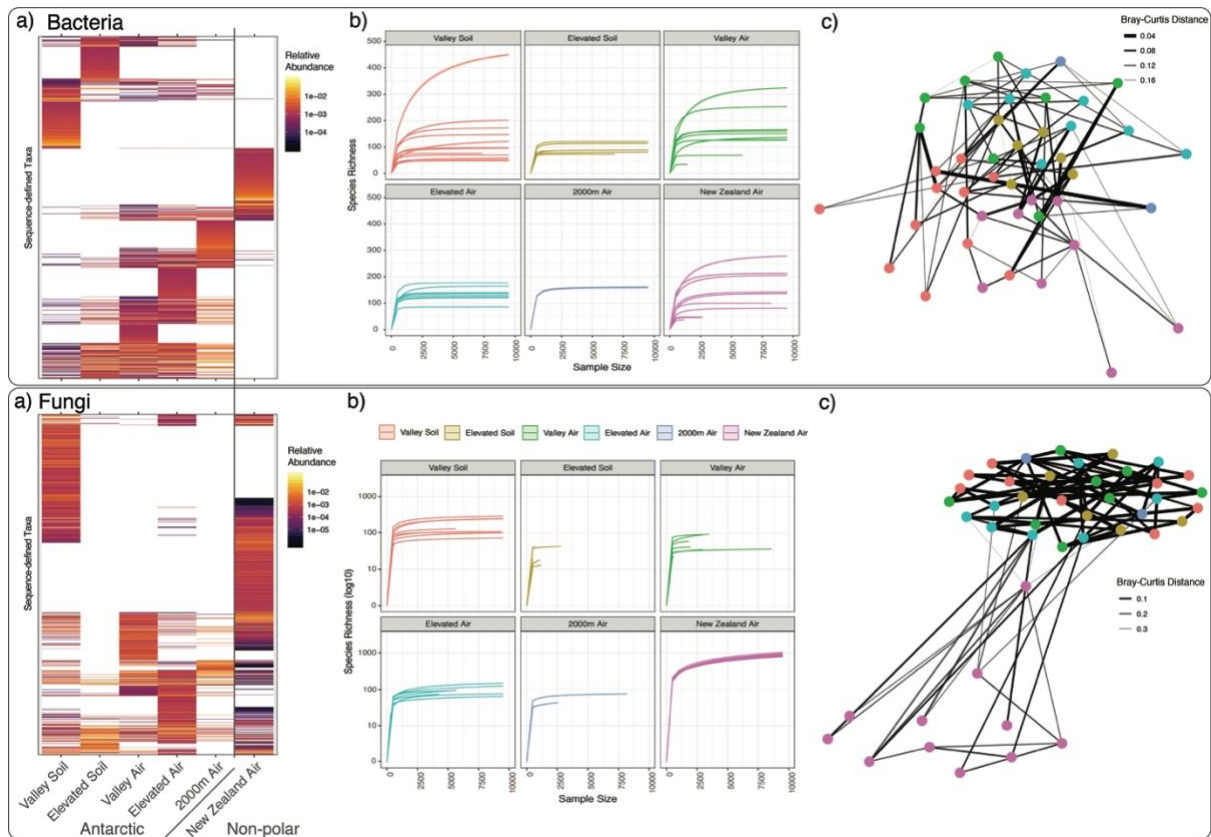

1  
2



1 **Fig. 3. Phylogenetic structuring of local and global pools for bacterial and fungal**  
2 **diversity. a)** Nestedness estimates made using the NODF model (where 0 = no  
3 nestedness, 100 = perfect nestedness). Fungi were more nested (NODF<sub>c</sub> = 62) than  
4 Bacteria (NODF<sub>c</sub> = 18). Bacteria and Fungi were significantly nested for taxa  
5 composition under the hypothesis that nestedness can be maximised by ordering sites  
6 from the most connected to the least connected. Least connected sites are demonstrated  
7 as a proper subset of richer, more connected sites. **b)** Net Relatedness Index analysis of  
8 phylogenetic structure within each sample type for Bacteria (b) and Fungi (f). Error  
9 bars show the standard error of the mean for all samples in a given substrate type.  
10 Values for highly dispersed non-polar bacterial communities associated with forest soil  
11 are given for comparison (bn) and indicated by an asterisk <sup>62</sup>. Sampling locations: valley  
12 (soil and 1.5m above ground), elevated (soil and 1.5m above ground at higher altitude  
13 locations at Bull Pass and valley ridges), 2000m (helicopter samples) and New Zealand  
14 (non-polar).  
15  
16

a)

|          | Connectivity gradient |     |        |     |        |     | Soil Selection Gradient |     |        |     |        |     |
|----------|-----------------------|-----|--------|-----|--------|-----|-------------------------|-----|--------|-----|--------|-----|
|          | NODF                  |     | NODFc  |     | NODFr  |     | NODF                    |     | NODFc  |     | NODFr  |     |
|          | Metric                | SES | Metric | SES | Metric | SES | Metric                  | SES | Metric | SES | Metric | SES |
| Bacteria | 33                    | -8  | 18     | 13  | 33     | -8  | 33                      | -8  | 29     | -17 | 33     | -8  |
| Fungi    | 30                    | -24 | 62     | 12  | 30     | -24 | 30                      | -21 | 13     | -16 | 30     | -21 |

b)

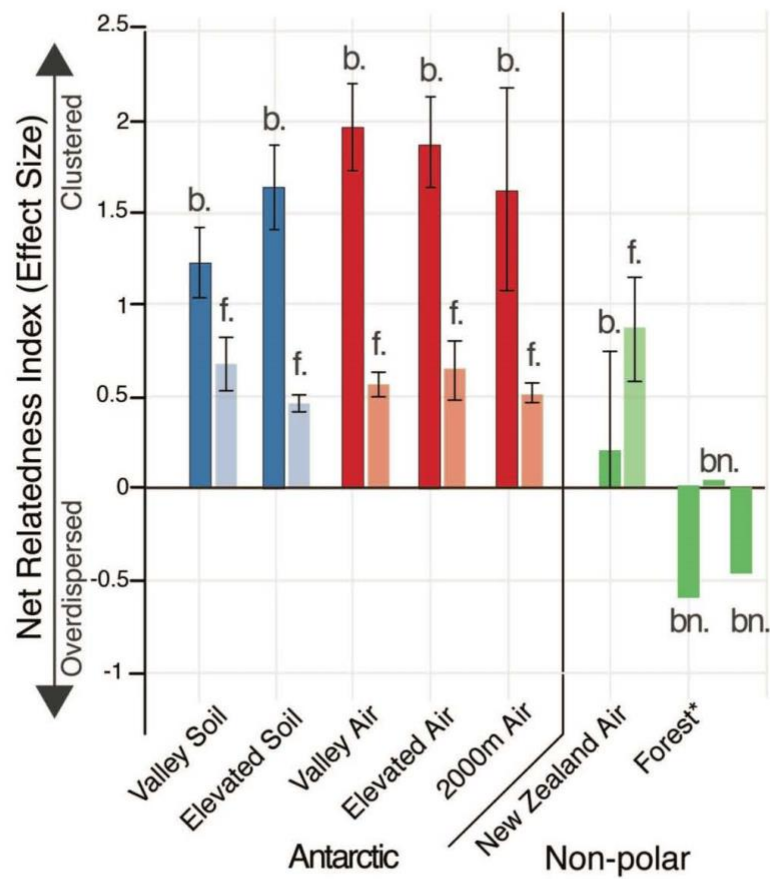

# 1 Microbial dispersal limitation to isolated soil habitats in the McMurdo Dry Valleys 2 of Antarctica

## 3 4 Online Supplementary Information

### 5 6 7 Supplementary Methods

8 To overcome the technological and methodological limitations of earlier  
9 approaches to aerosol sampling using low volume air pumps and impactor collection,  
10 which are known to introduce significant sampling bias to airborne microbial sampling  
11 <sup>1,2</sup>, we employed a high-volume liquid impinger apparatus (Coriolis  $\mu$ , Bertin  
12 Technologies, France) and developed a novel collection protocol optimised for low-  
13 temperature environments. This involved collection of samples directly into RNAlater  
14 nucleic acid preservative solution (Invitrogen, Carlsbad, CA). Evaporation was  
15 compensated for using a peristaltic pump set to between 0.5 and 1.3mL per minute with  
16 a mixture of phosphate-buffered saline (PBS) and 20% v/v RNAlater preservative  
17 solution. A random collection cone was assembled into the machine but not activated,  
18 and these were used as the negative controls. All collection cones were soaked in 1.5%  
19 sodium hypochlorite (NaClO) then washed with 70% ethanol and three washes of Milli-  
20 Q H<sub>2</sub>O before being filled with filtered RNAlater. All sampling equipment was  
21 disassembled between locations and cleaned with NaClO, ethanol and Milli-Q H<sub>2</sub>O.  
22 Samples in RNAlater were stored at 4°C during transit from Antarctica and until  
23 processed.

24 Air mass at near-surface (1.5m above ground) and corresponding soil sampling  
25 (top 10mm surface soil after removing pebbles and rocks) was conducted from 11 to 23  
26 January 2017 from eight locations throughout the Wright Valley floor (77.518633 S,  
27 161.768783 E) and high elevation locations at the valley ridge and Bull Pass (7.47085 S,  
28 161.77345 E). Air mass above the boundary layer for surface influence was also  
29 recovered by mounting the apparatus in a helicopter with an external sampling port  
30 (flightpath: 2,000m A>M.S.L., 77.440836 S, 162.657553 E to 77.524583 S, 161.690917  
31 E). Overall, we retrieved 33 massive bulk air samples plus underlying soil samples from  
32 18 locations (high altitude Antarctic air samples and non-polar air did not have  
33 accompanying soil samples). Massive bulk-phase air volumes (72,000L per sample)  
34 were collected for each discreet air sample location. Biotic data were retrieved for 30  
35 air samples with a total sampled volume of 2,160,000L, and from all soil samples.  
36 representing several orders of magnitude increase in sample volume over earlier  
37 studies (Kobayashi et al, sample n = 2, approx. 6,000 L total volume, total OTUs  
38 identified 213 <sup>3</sup>; Pearce et al, sample n = 2, total sample volume approx. 370,000 L, total  
39 OTUs identified approx. 30 <sup>4</sup>; Bottos et al, sample n = 2, total volume approx.. 150,000 L,  
40 total OTUs identified = 202 <sup>5</sup>).

41 At each station and time interval air flow rates of 300L/min were employed for  
42 4hrs into 15ml RNAlater. This approach overcomes limitations from earlier studies  
43 where low volume pumps have necessitated long sampling durations with uncertain  
44 microbial survival and recovery and impaction techniques that are known to bias  
45 against certain phyla <sup>2,6</sup>. Non-polar air samples were collected from New Zealand's  
46 North Island (36.916153 S, 174.645760 E) during the same austral summer season and

1 using the same method. We selected this place because our HYSPLIT back trajectory  
2 analysis (see below) indicated that this was the nearest non-polar land mass from  
3 which air mass arriving at the Dry Valleys location was derived. These samples were  
4 used to make broad diversity comparisons with possible exogenous sources although  
5 we acknowledge that additional variability is likely among non-polar aerosols given  
6 inherent uncertainties over their trajectory to the Antarctic. It should be noted that  
7 unlike other substrates with high micro-habitat variability such as soil it is neither  
8 possible nor necessary to obtain massive numbers of discreet replicate samples for a  
9 bulk phase such as air and so our approach focused on obtaining massive volume  
10 samples within sampling timeframes of hours which allowed meaningful inference from  
11 biological data (rather than pumps operating continuously for weeks or months as in  
12 previous studies and with the inherent problems this brings to downstream diversity  
13 estimation <sup>2-5</sup>). Each location was sampled at three discreet time intervals during the  
14 austral summer field season and the extremely low variability for diversity estimates  
15 from a given substrate support the validity of our approach.

16 Sampling was conducted within local weather parameters as follows: Relative  
17 humidity 20-58%, Temperature -3.3-6.9°C, wind speed 0.6-9.5m/S, wind direction E-  
18 ESE (Kestrel 3500 Weather Meter, Nielson-Kellerman Co, Minnesota, USA); Total near-  
19 ground air particulate matter 2939-6558 $\mu\text{g}/\text{m}^3$  PM<sub>2.5-10</sub> (Aerotrak, TSI Incorporated,  
20 Minnesota, USA). Back-trajectories of air mass arriving at each sampling interval were  
21 generated using the National Oceanic and Atmospheric Administration (NOAA)  
22 HYSPLIT-WEB model (<https://ready.arl.noaa.gov/HYSPLIT.php>). Separate calculations  
23 were made at 3d and 15d because they represent the average minimum and maximum  
24 residence times for microorganisms in air transported to the McMurdo Dry Valleys <sup>7</sup>.  
25 HYSPLIT back trajectories were calculated using the GDAS database and the model  
26 vertical velocity option. Three day back trajectories travelled between 598 and 2581 km  
27 with an average of 1350 km at an average altitude of 2769 m and a maximum altitude of  
28 5174 m above mean sea level (AMSL) Fifteen day back trajectories travelled between  
29 4673 and 11216 km with an average of 6886 km at an average altitude of 3034 m and a  
30 maximum altitude of 8211 m AMSL.

31 Airborne microbial samples from the RNA<sub>later</sub> preservation solution were  
32 filtered onto a 25mm 0.2 $\mu\text{m}$  polycarbonate filter and stored frozen until processed.  
33 Total DNA was directly extracted using a CTAB protocol <sup>8</sup>. DNA was extracted from  
34 three 0.75g  $\pm$ 0.025 of soil using the same CTAB protocol. DNA yield for these ultra-low  
35 biomass samples was quantified using the Qubit 2.0 Fluorometer (Invitrogen) in the  
36 range 1.06-8.44ng. Samples were then stored at -20°C until processed. We used DNA  
37 yield as an indirect estimate for biomass. We were unable to successfully apply direct  
38 cell/fluorescent particle counting due to the extremely low cell numbers in Antarctic  
39 air, although we acknowledge the validity of this approach in studies of higher biomass  
40 aerial habitats <sup>9</sup>. We did not apply real-time quantitative PCR as a further indirect  
41 estimate of biomass since the approach has significant limitations that preclude  
42 meaningful estimates of biomass from environmental samples with domain-specific  
43 PCR primers <sup>10,11</sup>.

44 Illumina MiSeq libraries were prepared as per manufacturer's protocol  
45 (Metagenomic Sequencing Library Preparation Part # 15044223 Rev. B; Illumina, San  
46 Diego, CA, USA) and as previously described with PhiX positive controls <sup>12</sup>. We targeted  
47 Bacteria and Fungi since these domains are the most abundant microorganisms in the  
48 McMurdo Dry Valleys <sup>13</sup>. PCR was conducted with primer sets targeting the V3-V4  
49 regions of bacterial and archaeal 16S rRNA gene: PCR1 forward (5' TCGTCGGCAG

1 CGTCAGATGT GTATAAGAGA CAGCCTACGG GNGGCWGCAG 3') and PCR1 reverse (5'  
2 GTCTCGTGGG CTCGGAGATG TGTATAAGAG ACAGGACTAC HVGGGTATCT AATCC 3') and  
3 the internal transcribed spacer region of fungal 18S and 5.8S rRNA genes: ITS1 forward  
4 (5' CTTGGTCATTTAGAGGAAGTAA 3') and ITS2 reverse (5' GCTGCGTTCTTCATCGATGC  
5 3'). These primers for Bacteria and Fungi are widely accepted to capture the broadest  
6 estimates of diversity<sup>14-16</sup> and were used according to recommended workflows for the  
7 Earth Microbiome Project (<http://www.earthmicrobiome.org>). Total sequence library  
8 sizes were 3,994,561 for bacteria and 2,437,256 for fungi before filtering and total  
9 counts in the processed dataset were 1,333,553 bacterial and 2,220,883 fungal  
10 sequences. A total of 3,636 bacterial and 5,525 fungal taxa were identified from these.  
11 All sequence data generated by this study has been submitted to the NCBI Sequence  
12 Read Archive under BioProject PRJEB27416 with accession numbers ERS3573837 to  
13 ERS3573946.

14 Sequencing data for 16S rRNA gene amplicons was processed based on the  
15 DADA2 v1.8<sup>17</sup> pipeline. Primers sequences were removed using cutadapt<sup>18</sup> to remove  
16 forward (CCTACGGGNGGCWGCAG) and reverse (GACTACHVGGGTATCTAATCC). The  
17 reads were uniformly trimmed to 280 bp (forward) and 250 bp (reverse) and then  
18 filtered by removing reads exceeding maximum expected error of 2 for forward reads  
19 and 5 for reverse reads or reads containing ambiguity N symbol. The reads were used to  
20 train the error model and then dereplicated to acquire unique sequences, which were  
21 used to infer sequence variants with the trained error model. The forward and reverse  
22 reads were merged and chimeric sequences were removed. For bacteria we used  
23 amplicon sequence variants (ASV) to assign operational taxonomic units (OTUs) since  
24 this has been shown as the most robust method currently available for bacterial 16S  
25 rRNA gene-defined taxa identification<sup>19</sup>. OTUs were given taxonomic assignment using  
26 DADA2 with SILVA nr v132 database<sup>20</sup> to provide species level assignment based on  
27 exact match between ASVs and known reference sequences. For fungal ITS1 amplicon  
28 data, the sequences were processed using USEARCH v9.0.2132<sup>21</sup>. The forward and  
29 reverse paired-end sequences were merged and filtered to remove reads >1 maximum  
30 expected error per sequence. Additionally, anomalous sequences (<200 or >500 bp in  
31 length or exceeding 20 homopolymers) were also removed. After dereplication and  
32 removal of singletons, the reads were clustered at 97% identity threshold to obtain  
33 representative sequences as OTUs<sup>14</sup>. Unfiltered reads were mapped onto these OTUs to  
34 produce an abundance table of the occurrence of these OTUs within the communities.  
35 The representative sequences were given taxonomic assignment using USEARCH  
36 SINTAX classifier and RDP Warcup training set v2 (rdp\_its\_v2)<sup>22</sup>.

37 The resulting OTUs were then processed as previously described<sup>23</sup>. The R  
38 packages phyloseq<sup>24</sup>, DESeq2<sup>25</sup> and ggplot2<sup>26</sup> were used for downstream analysis and  
39 visualisation including ordination and alpha/beta diversity calculations. Despite  
40 inherent bias due to underlying differences in substrate biomass influencing species  
41 richness estimates with any cross-habitat biogeographic analysis<sup>27</sup>, we are confident  
42 that comparable yet inherently low biomass in all our air and ultra-oligotrophic mineral  
43 soil samples minimised such influence and this was reflected in our diversity estimates.  
44 An exception was that fungi in non-polar air were markedly more taxon-rich than in  
45 Antarctic samples. Therefore we used guild analysis (FUNGuild<sup>28</sup>) to establish the  
46 predominantly phyllosphere origin of fungi in non-polar samples which are absent in  
47 Antarctica as well as the latitudinal gradient in fungal diversity<sup>29</sup> (lack of database  
48 depth for FUNGuild limited its value to identifying ecological guilds for non-polar fungi  
49 only). For heatmap visualisations the 1,000 most abundant OTUs in each data set were

1 selected, and these captured 91% bacterial and 96% fungal sequences. All other  
2 analysis used the entire sequence library data. Our heatmap analysis therefore had high  
3 confidence since the unsampled 'tail' comprised only extremely rare sequence variants  
4 at very low/singleton abundance.

5 We used multiple statistical approaches to test the null hypothesis that local soil  
6 and air sample communities were a random sample of the of the regional pool.  
7 Rejection of the hypothesis (i.e., non-random patterns) yields observational evidence  
8 for the alternative hypothesis that local communities are a non-random selection from  
9 the regional pool. Specifically, we expected local soil communities to be selected against  
10 the extreme conditions found at soils in the McMurdo Dry Valleys soil and thus to  
11 display clustering. At the same time, we expected air samples to be less structured or  
12 even random and thus better reflect the regional pool, although some structuring due to  
13 local influences from atmospheric stressors such as low temperatures and UV exposure  
14 were also be expected.

15 We employed approaches that utilised both taxonomic identity and phylogenetic  
16 structure of the communities. Ecological Network Analysis is a commonly employed  
17 tool to infer biotic interactions within and between communities by visualising links  
18 between species nodes. Potential relationships pertinent to our system include  
19 connectivity, clustering and nestedness which are informative to interpreting the  
20 biogeographic patterns of species occurrence<sup>30</sup>. We performed Ecological Network  
21 Analysis on our samples using the R package phyloseq<sup>24</sup> with maximum Bray-Curtis  
22 distance of 0.2 for Bacteria and 0.4 for Fungi to establish connection between nodes  
23 (representing communities). The nodes were positioned using the Fruchterman-  
24 Reingold method<sup>31</sup>.

25 Nestedness is a widespread biogeographical pattern that emerges when species  
26 composition of small assemblages is a nested subset of larger regional assemblages. We  
27 quantified this pattern using the metrics NODF<sup>32</sup> and its compositional (NODFc) and  
28 incidence (NODFr) version. This metric is currently considered one of the most effective  
29 and statistically robust, especially in relation to the null models that are used to test  
30 whether observed metrics are smaller or larger than expected by chance<sup>30,33</sup>. The  
31 metric ranges from 0, that is no nestedness or perfect antinestedness, to 100 (perfect  
32 nestedness). In a perfectly nested assemblage, species poor communities are just a  
33 subset of species richer communities, or less frequent species always occur in subsets of  
34 sites where most widespread species also occur, or a combination of both. We applied  
35 the NODF metrics to the matrix of the investigated sites both for Bacteria and Fungi. We  
36 simulated null models using a random swap algorithm (R project, vegan package,  
37 function "oecosimu"<sup>34</sup>) with fixed row and column sums. This combination to create a  
38 random matrix is the most conservative in terms of Type I and II errors and is  
39 particularly recommended when species co-occurrence is critical to the tested  
40 hypothesis<sup>30</sup>. We calculated Standardised Effect Sizes and tested for significance of  
41 effects with 999 permutations and at  $P < 0.01$ . We calculated NODF and null models by a  
42 specific order of sites in the matrix that reflected our main null hypothesis. This was  
43 that local communities are just a passive sampling from regional species pools.  
44 Specifically, we used two complementary orderings of the sites to test our hypothesis.  
45 First, we created a connectivity gradient, which assumed New Zealand is the site more  
46 connected to the global species pool while soils in the Antarctic Dry Valleys are the least  
47 connected (the exact order was: non-polar>high-altitude air>elevated air>valley  
48 air>elevated soil>valley soil). In the second test of the hypothesis local, more isolated  
49 soils were assumed to select more than connected soil and air habitats. In this case, sites

1 were ordered as follows: Valley Soil>Elevated Soil>Valley Air>Elevated Air>high-  
2 altitude air>non-polar air.

3 Community phylogenetic metrics were calculated using the R <sup>35</sup> packages picante  
4 <sup>36</sup>, ape <sup>37</sup>, phylobase <sup>38</sup>, adephylo <sup>39</sup>, and phytools <sup>40</sup>. Phylogenetic trees for community  
5 phylogenetic structure analysis were constructed for all OTUs with FastTree v2.1.9 on  
6 multiple alignment of sequences produced by MUSCLE v3.8.31. For Bacteria an  
7 approximately Maximum-Likelihood approach was used whilst for Fungi an alignment-  
8 free distance approach with Neighbour-Joining method was employed in order generate  
9 a ITS-based phylogenetic tree for community metrics <sup>41</sup>. The distance approach was  
10 used for Fungi as the hypervariability of ITS1 loci hinders multiple sequence alignment  
11 required for most phylogenetic analyses. To validate this approach, we compared our  
12 tree topology with the most recent whole genome phylogenies for the Fungi <sup>42,43</sup>. This  
13 approach was robust at higher taxonomic levels (there is no consensus for fungal  
14 phylogenies using multiple loci or whole genomes below Order rank) and has been used  
15 successfully with other eukaryotic taxa as a workflow for Net Relatedness analysis <sup>44</sup>.  
16 Although we acknowledge limitations to this approach, the advantages of using ITS loci  
17 for taxonomic identification vastly outweighed its shortcomings, and we also  
18 triangulated data from this test with additional analytical approaches, so overall our  
19 inclusion of this test is justified and interpreted conservatively. Mean phylogenetic  
20 distance (MPD) <sup>45</sup> was calculated to measure phylogenetic distance between ASVs and  
21 OTUs in each sample and converted to the Net Relatedness Index (NRI) by multiplying  
22 them by -1. A null model algorithm based on independent swap (999 randomisation)  
23 was used to test the extent of phylogenetically clustering (positive values) or  
24 overdispersion (negative values) <sup>46</sup>. Results for NRI were expressed as effects size,  
25  $(MPD - MPD_{null})/SD(MPD_{null})$ . Distance Decay of phylogenetic versus geographic  
26 distance for bacteria and fungi was estimated using the R package Vegan <sup>34</sup>.

## 27 28 **References**

- 29 1. Luhung, I. *et al.* Protocol improvements for low concentration DNA-based bioaerosol  
30 sampling and analysis. *PLoS One* **10**, e0141158 (2015).
- 31 2. Dybwad, M., Skogan, G. & Blatny, J. M. Comparative testing and evaluation of nine  
32 different air samplers: End-to-end sampling efficiencies as specific performance  
33 measurements for bioaerosol applications. *Aerosol Sci. Technol.* **48**, 282–295 (2014).
- 34 3. Kobayashi, F. *et al.* Atmospheric bioaerosols originating from Adélie penguins (*Pygoscelis*  
35 *adeliae*): Ecological observations of airborne bacteria at Hukuro Cove, Langhovde,  
36 Antarctica. *Polar Sci.* **10**, 71–78 (2016).
- 37 4. Pearce, D. A., Hughes, K. A., Lachlan-Cope, T., Harangozo, S. A. & Jones, A. E. Biodiversity of  
38 air-borne microorganisms at Halley station, Antarctica. *Extremophiles* **14**, 145–159  
39 (2010).
- 40 5. Bottos, E. M. E. M., Woo, A. C. A. C., Zawar-Reza, P., Pointing, S. B. S. B. & Cary, S. C. S. C.  
41 Airborne Bacterial Populations Above Desert Soils of the McMurdo Dry Valleys,  
42 Antarctica. *Microb. Ecol.* **67**, 120–128 (2013).
- 43 6. Šantl-Temkiv, T. *et al.* High-Flow-Rate Impinger for the Study of Concentration, Viability,  
44 Metabolic Activity, and Ice-Nucleation Activity of Airborne Bacteria. *Environ. Sci. Technol.*  
45 **51**, 11224–11234 (2017).
- 46 7. Burrows, S. M. *et al.* Bacteria in the global atmosphere – Part 2: Modeling of emissions  
47 and transport between different ecosystems. *Atmos. Chem. Phys.* **9**, 9281–9297 (2009).
- 48 8. Archer, S. D. J., McDonald, I. R., Herbold, C. W., Lee, C. K. & Cary, C. S. Benthic microbial  
49 communities of coastal terrestrial and ice shelf Antarctic meltwater ponds. *Frontiers in*  
50 *Microbiology* **6**, 485 (2015).
- 51 9. Mayol, E. *et al.* Long-range transport of airborne microbes over the global tropical and

- 1           subtropical ocean. *Nat. Commun.* **8**, 201 (2017).
- 2   10.   Fierer, N., Jackson, J. A., Vilgalys, R. & Jackson, R. B. Assessment of Soil Microbial  
3           Community Structure by Use of Taxon-Specific Quantitative PCR Assays. *Appl. Environ.*  
4           *Microbiol.* **71**, 4117–4120 (2005).
- 5   11.   Props, R. *et al.* Absolute quantification of microbial taxon abundances. *ISME J.* **11**, 584–  
6           587 (2017).
- 7   12.   Warren-Rhodes, K. *et al.* Subsurface microbial habitats in an extreme desert Mars-  
8           analogue environment. *bioRxiv* 269605 (2018). doi:10.1101/269605
- 9   13.   Cowan, D. A., Makhalyane, T. P., Dennis, P. G. & Hopkins, D. W. Microbial ecology and  
10          biogeochemistry of continental Antarctic soils. *Front. Microbiol.* **5**, 154 (2014).
- 11   14.   Schoch, C. L. *et al.* Nuclear ribosomal internal transcribed spacer (ITS) region as a  
12          universal DNA barcode marker for Fungi. *Proc. Natl. Acad. Sci. U. S. A.* **109**, 6241–6  
13          (2012).
- 14   15.   Thompson, L. R. *et al.* A communal catalogue reveals Earth’s multiscale microbial  
15          diversity. *Nature* **551**, 457–463 (2017).
- 16   16.   Delgado-Baquerizo, M. *et al.* A global atlas of the dominant bacteria found in soil. *Science*  
17          (80-. ). **359**, 320–325 (2018).
- 18   17.   Callahan, B. J., McMurdie, P. J., Rosen, M. J., Han, A. W. & A, A. J. DADA2: High resolution  
19          sample inference from Illumina amplicon data. *Nat. Methods* **13**, 581–583 (2016).
- 20   18.   Martin, M. Cutadapt removes adapter sequences from high-throughput sequencing reads.  
21          *EMBnet.journal* **17**, 10 (2011).
- 22   19.   Callahan, B. J., McMurdie, P. J. & Holmes, S. P. Exact sequence variants should replace  
23          operational taxonomic units in marker-gene data analysis. *ISME J.* **11**, 2639–2643 (2017).
- 24   20.   Quast, C. *et al.* The SILVA ribosomal RNA gene database project: Improved data  
25          processing and web-based tools. *Nucleic Acids Res.* **41**, 590–596 (2013).
- 26   21.   Edgar, R. C. Search and clustering orders of magnitude faster than BLAST. *Bioinformatics*  
27          **26**, 2460–2461 (2010).
- 28   22.   Deshpande, V. *et al.* Fungal identification using a Bayesian classifier and the Warcup  
29          training set of internal transcribed spacer sequences. *Mycologia* **108**, 1–5 (2016).
- 30   23.   Maki, T. *et al.* Variations in the structure of airborne bacterial communities in Tsogt-Ovoo  
31          of Gobi desert area during dust events. *Air Qual. Atmos. Heal.* **10**, 249–260 (2017).
- 32   24.   McMurdie, P. J. & Holmes, S. phyloseq: An R Package for Reproducible Interactive  
33          Analysis and Graphics of Microbiome Census Data. *PLoS One* **8**, e61217 (2013).
- 34   25.   Love, M. I., Huber, W. & Anders, S. Moderated estimation of fold change and dispersion  
35          for RNA-seq data with DESeq2. *Genome Biol.* **15**, 550 (2014).
- 36   26.   Wickham, H. *ggplot2*. (Springer New York, 2009). doi:10.1007/978-0-387-98141-3
- 37   27.   Pointing, S. B. *et al.* Biogeography of photoautotrophs in the high polar biome. *Front.*  
38          *Plant Sci. Funct. Plant Ecol.* **6**, 692 (2015).
- 39   28.   Nguyen, N. H. *et al.* FUNGuild: An open annotation tool for parsing fungal community  
40          datasets by ecological guild. *Fungal Ecol.* **20**, 241–248 (2016).
- 41   29.   Tedersoo, L. *et al.* Global diversity and geography of soil fungi. *Science (80-. ).* **346**,  
42          (2014).
- 43   30.   Ulrich, W., Almeida-Neto, M. & Gotelli, N. J. A consumer’s guide to nestedness analysis.  
44          *Oikos* **118**, 3–17 (2009).
- 45   31.   Fruchterman, T. M. J. & Reingold, E. M. *Graph Drawing by Force-directed Placement.* **21**,  
46          (1991).
- 47   32.   Almeida-Neto, M., Guimarães, P., Guimarães, P. R., Loyola, R. D. & Ulrich, W. A consistent  
48          metric for nestedness analysis in ecological systems: reconciling concept and  
49          measurement. *Oikos* **117**, 1227–1239 (2008).
- 50   33.   Ulrich, W. *et al.* A comprehensive framework for the study of species co-occurrences,  
51          nestedness and turnover. *Oikos* **126**, 1607–1616 (2017).
- 52   34.   Oksanen, J. *et al.* R package: Vegan. (2017).
- 53   35.   Swenson, N. G. *Functional and Phylogenetic Ecology in R.* (Springer New York, 2014).  
54          doi:10.1007/978-1-4614-9542-0



- 1 36. Kembel, S. W. *et al.* Picante: R tools for integrating phylogenies and ecology.  
2 *Bioinformatics* **26**, 1463–1464 (2010).
- 3 37. Paradis, E. Ape package. (2018). Available at:  
4 <https://www.rdocumentation.org/packages/ape/versions/5.2>. (Accessed: 24th October  
5 2018)
- 6 38. Michonneau, F. Phylobase package. Available at:  
7 <https://www.rdocumentation.org/packages/phylobase/versions/0.8.4>. (Accessed: 24th  
8 October 2018)
- 9 39. Dray, S. Adephylo package. Available at:  
10 <https://www.rdocumentation.org/packages/adephylo/versions/1.1-11>. (Accessed: 24th  
11 October 2018)
- 12 40. Zhang, J. Phylotools package. Available at:  
13 <https://www.rdocumentation.org/packages/phylotools/versions/0.2.2>. (Accessed: 24th  
14 October 2018)
- 15 41. Höhl, M., Rigoutsos, I. & Ragan, M. A. Pattern-based phylogenetic distance estimation and  
16 tree reconstruction. *Evol. Bioinform. Online* **2**, 359–75 (2007).
- 17 42. Choi, J. & Kim, S.-H. A genome Tree of Life for the Fungi kingdom. *Proc. Natl. Acad. Sci. U.*  
18 *S. A.* **114**, 9391–9396 (2017).
- 19 43. Ebersberger, I. *et al.* A Consistent Phylogenetic Backbone for the Fungi. *Mol. Biol. Evol.* **29**,  
20 1319–1334 (2012).
- 21 44. Boyle, E. E. & Adamowicz, S. J. Community phylogenetics: Assessing tree reconstruction  
22 methods and the utility of DNA barcodes. *PLoS One* **10**, (2015).
- 23 45. Kembel, S. W. & Hubbell, S. P. The phylogenetic structure of a neotropical forest tree  
24 community. *Ecology* **87**, 86–99 (2006).
- 25 46. Webb, C. O., Ackerly, D. D. & Kembel, S. W. Phylocom: software for the analysis of  
26 phylogenetic community structure and trait evolution. *Bioinformatics* **24**, 2098–2100  
27 (2008).
- 28
- 29

1 **Fig. S1. Sampling locations in the Wright Valley, McMurdo Dry Valleys, Antarctica.**

2 All ground sampling was completed at a consistent height at a site removed from  
3 significant topographical variation to ensure minimal local wind effects. The air intake  
4 was orientated towards the prevailing wind direction at the time of sampling and was  
5 only approached from downwind. Helicopter sampling (Helo) was conducted at 2,000  
6 m AMSL with the intake outside of the passenger window.  
7

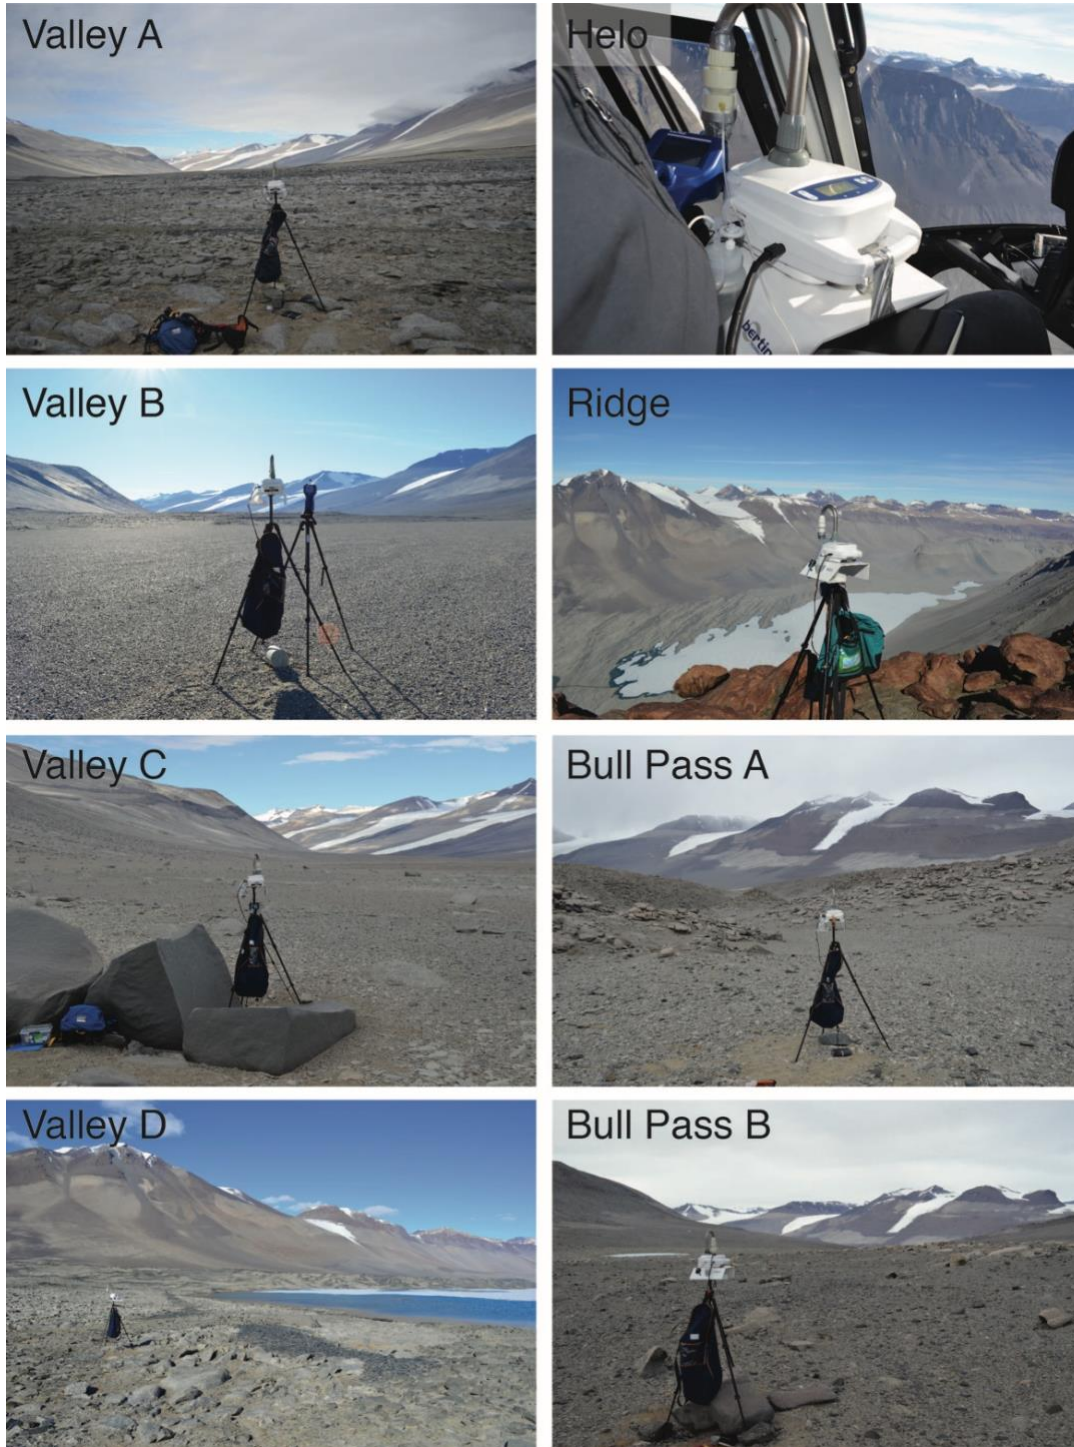

8  
9  
10

1 **Supplementary Figure S2.** Interactive bar charts for taxonomic identity of bacteria and  
2 fungi in each air and soil sample. Individual charts are presented for taxonomic identity  
3 at Phylum, Class and Genus. Readers can select any item in the plots and the taxon  
4 identity and relative abundance will be displayed. The overall bar charts for a) Bacteria  
5 and b) Fungi for all Antarctic and non-polar samples are displayed here at the Phylum  
6 level for reference. Black lines indicate delineations at lower taxonomic ranks. Bacteria  
7 in non-polar air displayed similar taxa richness to Antarctic air whereas Fungi were  
8 markedly more diverse and Guild Analysis was employed to illustrate this reflected  
9 phyllosphere input <sup>28</sup>.

10

11 File names for interactive bar charts:

- 12 1. Bacteria\_Phylum.html
- 13 2. Bacteria\_Class.html
- 14 3. Bacteria\_Genus.html
- 15 4. Fungi\_Phylum.html
- 16 5. Fungi\_Class.html
- 17 6. Fungi\_Genus.html

18

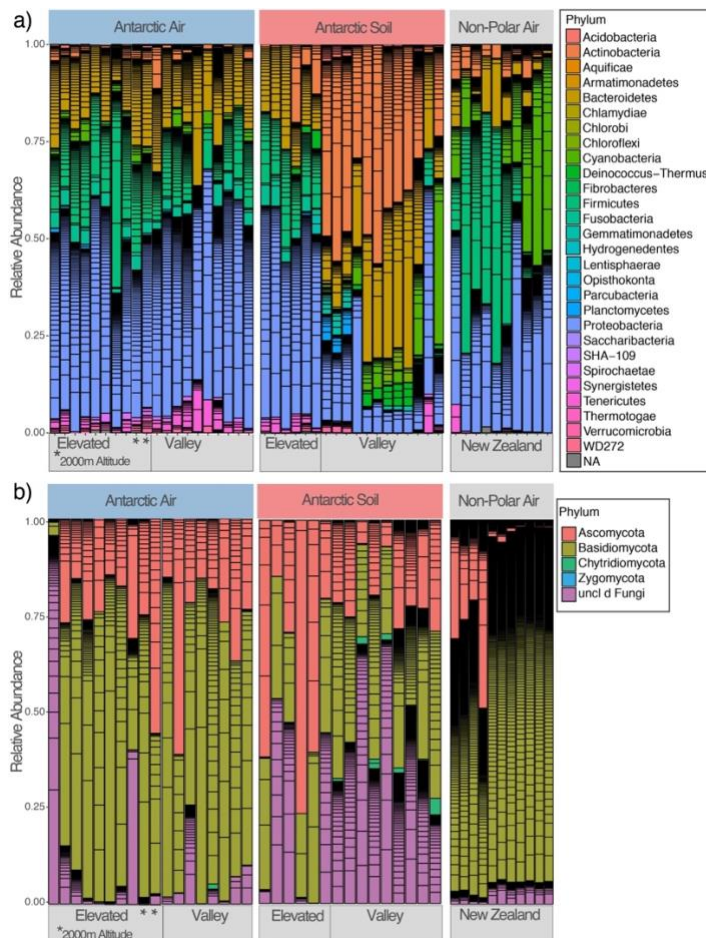

19

20
